# Supplementary material for: Effects of heterospecific and conspecific vibrational signal overlap and signal-to-noise ratio on male responsiveness inNezara viridula(L.)
Source: Oxford University Press journal article supplement (doi:10.1242/jeb.044024), 2010-08-27
Supplement: jeb044024supptables1.pdf [file jeb044024supptables1.pdf]

Table S1. Test statistics for the relationship between the proportion of signalling males and the mean of square rooted MCrS rate using a GLM model.

|           | Estimate | Std. error | <i>t</i> -Value | <i>P</i> |
|-----------|----------|------------|-----------------|----------|
| Intercept | -2.223   | 0.4551     | -4.884          | <0.0001  |
| MCrS rate | 2.6023   | 0.351      | 7.413           | <0.0001  |
