# Supplementary figures and images for: Effects of heterospecific and conspecific vibrational signal overlap and signal-to-noise ratio on male responsiveness inNezara viridula(L.)
Source: Oxford University Press journal article supplement (doi:10.1242/jeb.044024), 2010-08-27

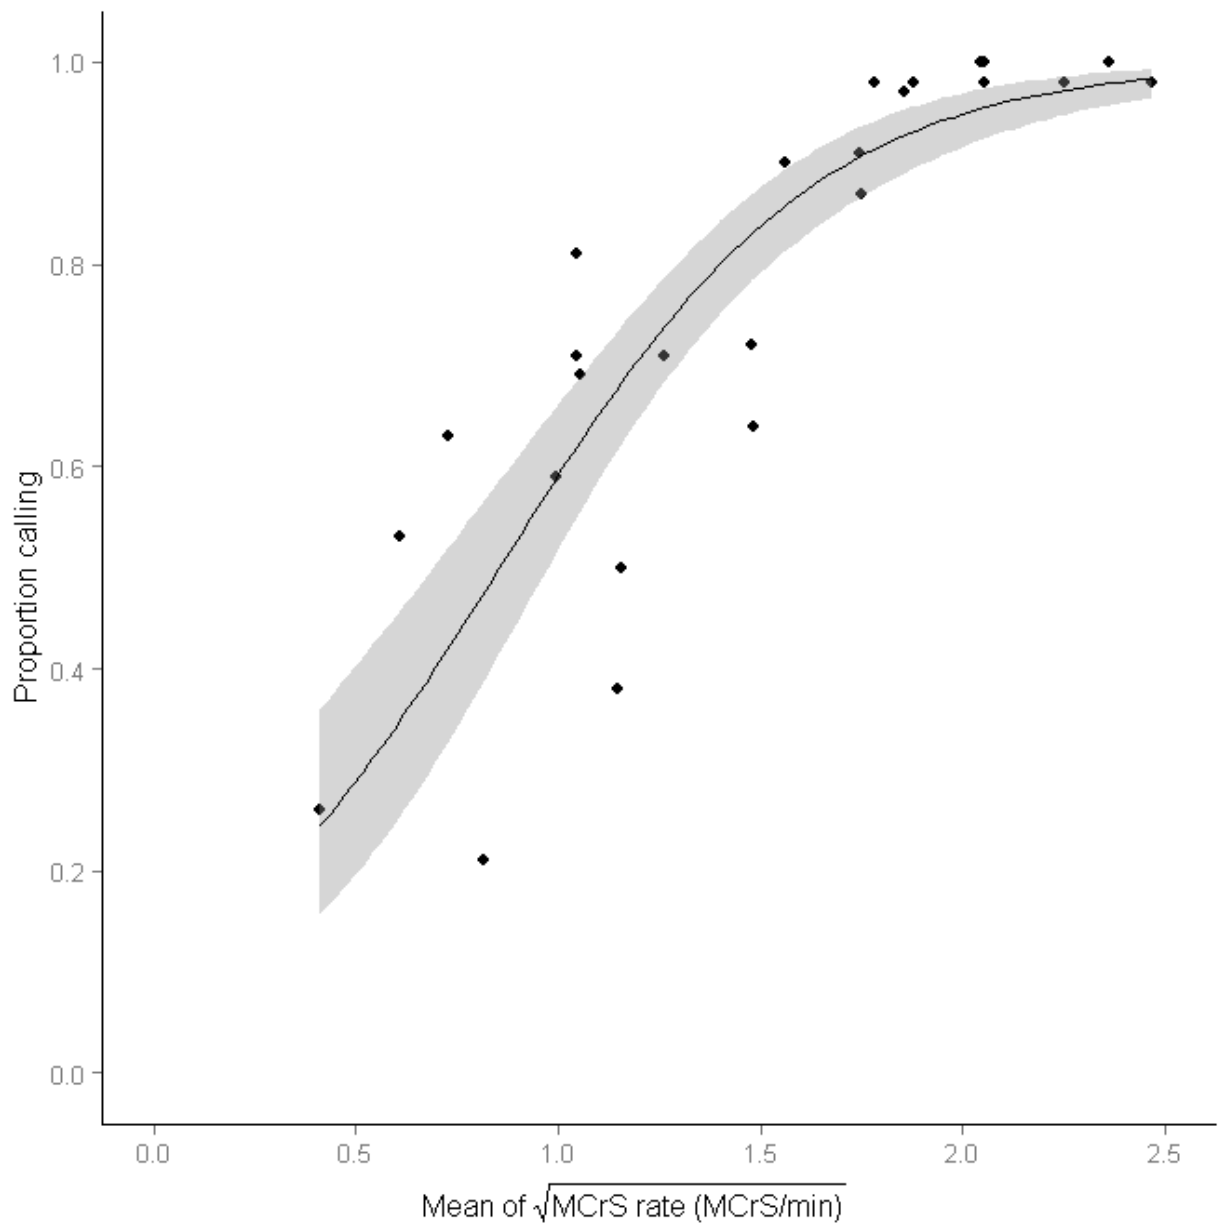

Supplement: jeb044024figs1.pdf [file jeb044024figs1.pdf]
